# Supplementary material for: Integrin α6 promotes esophageal cancer metastasis and is targeted by miR-92b
Source: PubMed Central journal article supplement (PMC5351662; doi:10.18632/oncotarget.14259), 2016-12-27
Supplement: oncotarget-08-6681-s001.pdf [file oncotarget-08-6681-s001.pdf]

## Integrin $\alpha 6$ promotes esophageal cancer metastasis and is targeted by miR-92b

### SUPPLEMENTARY FIGURES AND TABLES

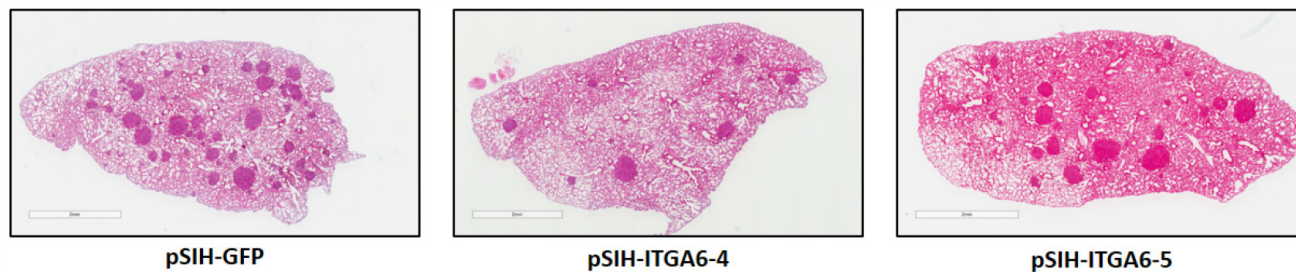

**Supplementary Figure 1: H&E stain of the lungs from the control and the integrin  $\alpha 6$  knockdown group.** Fewer metastatic nodules could be observed in the lungs of the integrin  $\alpha 6$  silenced mice than these counterparts from the control mice. The bars in the images indicate 2 mm.

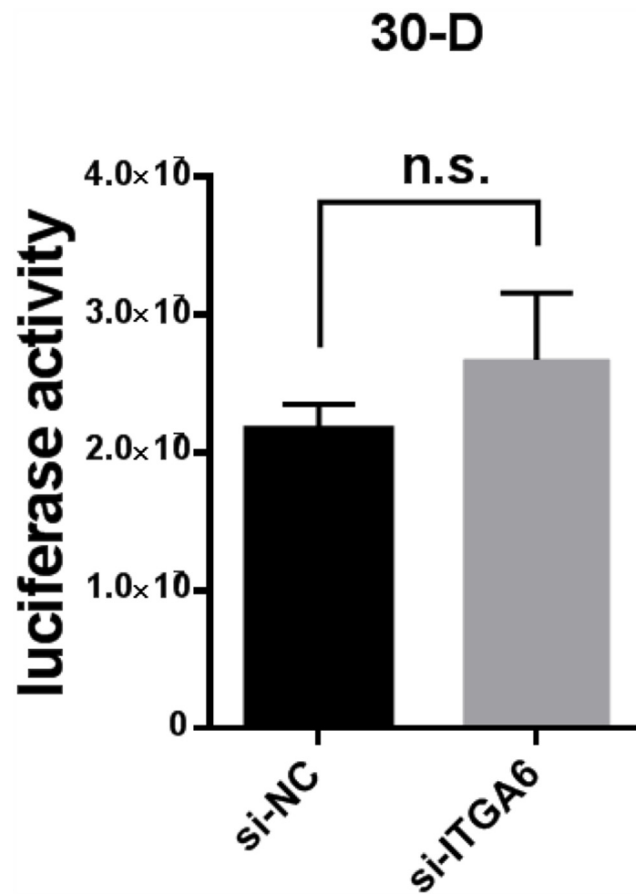

**Supplementary Figure 2: Reduced integrin  $\alpha 6$  does not affect the luciferase activity.** The specific siRNAs (100 nM in total) against integrin  $\alpha 6$  and the scramble oligos were delivered into 30-D cells, respectively. Around 20 hr later, the luciferase activity were detected using Luciferase Assay Kit (Promega, WI, USA).

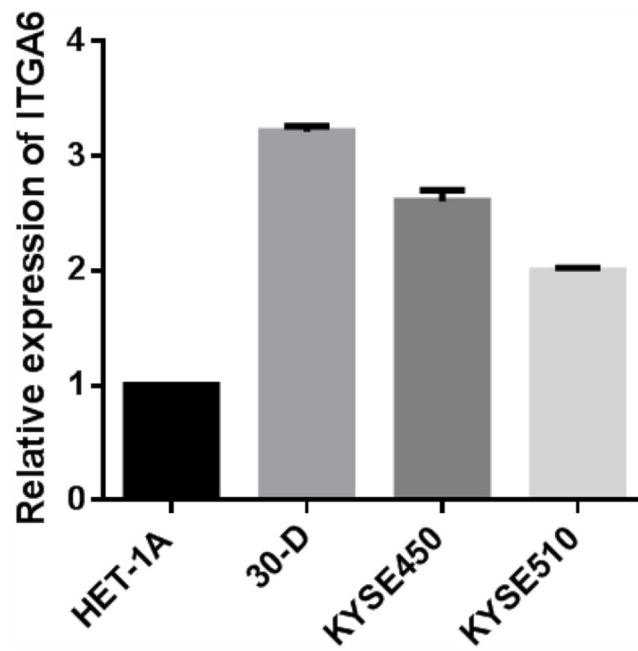

**Supplementary Figure 3: Integrin  $\alpha 6$  expression is higher in ESCC cell lines than that in normal esophageal cell line.** The mRNA level of integrin  $\alpha 6$  was detected by RT-qPCR. The data was analyzed using  $2^{-\Delta\Delta Ct}$  method.

**Supplementary Table 1: Primary antibodies used in this investigation**

| <b>Primary antibody</b> | <b>catalog</b> | <b>Vendor</b>  | <b>Application</b> |
|-------------------------|----------------|----------------|--------------------|
| ITGA6                   | 3883-1         | Epitomics      | WB                 |
| ITGA6                   | NBP1-85747     | NOVUS          | IHC                |
| ITGA6                   | 561893         | BD             | FC                 |
| GAPDH                   | G8795          | Sigma          | WB                 |
| FAK Antibody Sample Kit | 9330           | Cell Signaling | WB                 |
| Phospho-Akt (Thr308)    | 2965           | Cell Signaling | WB                 |
| Akt (pan)               | 4685           | Cell Signaling | WB                 |

Supplementary Table 2: List of primers and oligos used in this investigation

| Application                           | Sequence                                                                      |
|---------------------------------------|-------------------------------------------------------------------------------|
| <b>Clone</b>                          |                                                                               |
| ITGA6 3'UTR                           | F: TTGAGCTCAGAGTGACTACACACAGTACG<br>R: TTGCTAGCTTATTAACAACACTCTCTCTGGTAC      |
| <b>microRNA reverse transcription</b> |                                                                               |
| miR-92b                               | CTCAACTGGTGTCTGGAGTCGGCAATTCAGTTGAGGGAGGCCG                                   |
| <b>qPCR detection</b>                 |                                                                               |
| miR-92b                               | F: ACACTCCAGCTGGGTATTGCACTCGTCCCG<br>R: TGGTGTCTGGAGTCG                       |
| ITGA6                                 | F: GCTGGTTATAATCCTTCAATATCAATTGT<br>R: TTGGGCTCAGAACCTTGGTTT                  |
| GAPDH                                 | F: TGCACCACCAACTGCTTAGC<br>R: GGCATGGACTGTGGTCATGAG                           |
| U6                                    | F: CTCGCTTCGGCAGCACA<br>R: AACGCTTCACGAATTTGCGT                               |
| <b>Mutation</b>                       |                                                                               |
| ITGA6 UTR mut                         | F: AATCACGTTATGAAGGTGATGTTGCCATCCTAC<br>R: TAGTTTAAGACAGCACTTTCCGTTGAAACACAAC |
| <b>shRNA oligos</b>                   |                                                                               |
| ITGA6 sh-4 target                     | GTTTCTGGATTCATACTGTAA                                                         |
| ITGA6 sh-5 target                     | ATCCCGGCCTGTGATTAATATT                                                        |
| GFP shRNA target                      | CGAGAAGCGCGATCACATG                                                           |
